1 **The genomic diversification of clonally propagated grapevines**

2

3 Amanda M. Vondras<sup>1</sup>, Andrea Minio<sup>1</sup>, Barbara Blanco-Ulate<sup>2</sup>, Rosa Figueroa-Balderas<sup>1</sup>,

4 Michael A. Penn<sup>1</sup>, Yongfeng Zhou<sup>3</sup>, Danelle Seymour<sup>3</sup>, Ye Zhou<sup>1</sup>, Dingren Liang<sup>1</sup>, Lucero K.

5 Espinoza<sup>1</sup>, Michael M. Anderson<sup>1</sup>, M. Andrew Walker<sup>1</sup>, Brandon Gaut<sup>3</sup>, Dario Cantu<sup>1\*</sup>

6

7 <sup>1</sup> Department of Viticulture and Enology, University of California Davis, Davis, CA 95616

8 <sup>2</sup> Department of Plant Sciences, University of California, Davis, CA 95616

9 <sup>3</sup> Department of Ecology and Evolutionary Biology, University of California, Irvine, CA 92617

10 \*Corresponding author. Telephone: +1 530-752-2929 Email: [dacantu@ucdavis.edu](mailto:dacantu@ucdavis.edu)

11

12

13

14

15

16

17

18

19

20

21

22

23

24

## 25 **Abstract**

26 Vegetatively propagated clones accumulate somatic mutations. The purpose of this study was to  
27 better understand the consequences of clonal propagation and involved defining the nature of  
28 somatic mutations throughout the genome. Fifteen Zinfandel winegrape clone genomes were  
29 sequenced and compared to one another using a highly contiguous genome reference produced  
30 from one of the clones, Zinfandel 03.

31 Though most heterozygous variants were shared, somatic mutations accumulated in individual  
32 and subsets of clones. Overall, heterozygous mutations were most frequent in intergenic space  
33 and more frequent in introns than exons. A significantly larger percentage of CpG, CHG, and  
34 CHH sites in repetitive intergenic space experienced transition mutations than genic and non-  
35 repetitive intergenic spaces, likely because of higher levels of methylation in the region and the  
36 increased likelihood of methylated cytosines to spontaneously deaminate. Of the minority of  
37 mutations that occurred in exons, larger proportions of these were putatively deleterious when  
38 they occurred in relatively few clones.

39 These data support three major conclusions. First, repetitive intergenic space is a major driver of  
40 clone genome diversification. Second, clonal propagation is associated with the accumulation of  
41 putatively deleterious mutations. Third, the data suggest selection against deleterious variants in  
42 coding regions such that mutations are less frequent in coding than noncoding regions of the  
43 genome.

44

## 45 **Keywords**

46 Clonal propagation, DNA methylation, genome diversification, somatic mutations, structural  
47 variation, transposable elements

48

## 49 **Introduction**

50 Cultivated grapevines are clonally propagated. As a result, the genome of each cultivar is  
51 preserved, except for the accumulation of mutations that accumulate over time and can generate  
52 distinguishable clones [1-4]. Somatic mutations are responsible for several notable phenotypes.  
53 For example, a single, semi-dominant nucleotide polymorphism can affect hormone response [5]  
54 and recessive insertion of the *Gret1* retrotransposon in the promoter of the *VvmybA1*  
55 transcription factor inhibits anthocyanin accumulation in white varieties [6], as do additional  
56 mutations affecting the color locus [7-10]. The fleshless fruit of an Ugni Blanc clone and the  
57 reiterated reproductive meristems observed in a clone of Carignan are both caused by dominant  
58 transposon insertion mutations [11,12]. In citrus, undesirable mutations can be unknowingly  
59 propagated that render fruit highly acidic and inedible [13,14]. Interestingly, somatic mutations  
60 in plum are associated with a switch from climacteric to non-climacteric ripening behavior [15].

61 There is limited understanding and evidence of the extent, nature, and implications of the  
62 somatic mutations that accumulate in clonally propagated crops [16]. Genotyping approaches  
63 based on whole genome sequencing make it possible to identify genetic differences without  
64 predefined markers [17-19] and expedite learning the genetic basis of valuable traits and  
65 developmental processes [15,20]. Still, few previous studies have used genomic approaches to  
66 study somatic variations among clones [17-21]. The first to publish a genome-wide exploration  
67 of somatic variation in grapevine was Carrier *et al.* (2012), finding that transposable elements  
68 were the largest proportion of somatic mutation types affecting four Pinot Noir clones [18].

69 Whole genome sequencing was also used to study structural variations and complex  
70 chromosomal rearrangements in Tempranillo, comparing diverse accessions of phenotypically  
71 distinct Tempranillo Tinto and Tempranillo Blanco to better understand the basis of somatic  
72 mutations giving rise to red versus white fruit [20]. Genomic tools could be used to  
73 comprehensively describe the extent of somatic mutations and infer the processes affecting clone  
74 genomes.

75 Mutations occur in somatic cells that proliferate by mitosis. These can occur by a variety  
76 of means, including single base-pair mutations [22,23] that are more prevalent in repetitive  
77 regions because methylated cytosines passively deaminate to thymines [24-26], polymerase  
78 slippage that drives variable microsatellite insertions and deletions [27], and larger structural  
79 rearrangements and hemizygous deletions [10,20]. Transposable elements are also a major  
80 source of somatic mutations in grapevines [18], though transcriptional and post-transcriptional  
81 mechanisms exist to prevent transposition and maintain genome stability [28-31]. Notably,  
82 methylation of transposable elements is one specific mechanism that prevents transposition,  
83 which establishes a tradeoff, then, between methylation and the transposition of mobile elements.

84 At the cellular level, distinct clones can emerge following a mutation in a shoot apical  
85 meristem that spreads throughout a single cell layer, creating periclinal chimeras. This chimera is  
86 stable for Pinot Meunier, a clone of Pinot Noir with distinct L1 and L2 layers in shoots [3]. Each  
87 cell layer in a stratified apical meristem like that observed in grape [32] is developmentally  
88 distinct. The distinct cell layers will remain so provided cell divisions occur anticlinally. But,  
89 periclinal divisions and cellular rearrangements can result in the homogenization of a mutant  
90 genotype across cell layers [33]. This is the case for green-yellow bud sports of the grey-fruited  
91 Pinot Gris, wherein sub-epidermal white cells invaded and displaced epidermal pigmented cells

92 [9]. In contrast to replacement (L1 cells invade L2), displacement is likely more common  
93 because of the relative disorganization of the inner cell layers [32,33].

94 Meristem architecture is related to the fate of somatic mutations, as it influences the  
95 impact of these mutations and the likelihood of competition between cell lineages, also known as  
96 diplontic selection [34-36]. Provided each cellular layer is maintained by anticlinal divisions,  
97 deleterious mutations can be preserved in periclinal chimeras [35,37]. In addition, the  
98 predominance of “hidden”, heterozygous recessive somatic mutations [2,37] may further shield  
99 somatic mutations from selective forces. These factors are permissive of the accumulation of  
100 somatic mutations. Diplontic selection could occur if periclinal cell divisions result in the  
101 invasion of one cell layer by cells from another [34,35]. This mechanism could oppose the  
102 accrual of deleterious mutations expected by Muller [38,39]. A recent study of the long-lived  
103 pedunculate oak described substantial intra-organismal genetic variation, but did not draw  
104 conclusions about the contribution of somatic variations to large-scale oak evolution [21].  
105 Evidence of diplontic selection in plants is remarkably scarce [37], though its likelihood given  
106 different circumstances has been modeled [34,35,40]. Given the prevalence of chimerism and  
107 rearrangements documented in the model [9,33], grapevine is a suitable model for investigating  
108 the possibility of selection during vegetative propagation.

109 Zinfandel is the third-most cultivated wine grape in California [41,42] DNA profiling  
110 produced evidence that Zinfandel is synonymous with Primitivo grown in Italy [43] and Croatian  
111 Pribidrag and Crljenak Kastelanski [44]. Historical records plus the cultivation of closely related  
112 cultivars support Croatia as the likely origin of Zinfandel [44-47] and also that Primitivo was  
113 likely brought to the Gioia del Colle region in Italy by Benedictine monks in the 17<sup>th</sup> century  
114 [3,48]. The reported variability in Zinfandel [49-51], including subtle variability in phenolic

115 metabolites (Additional file 1), and its long history of cultivation make it a useful model for  
116 studying clonal variation in grapevine, specifically, and the nature of the accumulation of  
117 somatic mutations in clonally propagated crops, generally.

118         The purpose of this study was to better understand the nature of the somatic variations  
119 that occur during clonal propagation. Representatives from at least a portion of Zinfandel's  
120 history [44-47] from Croatia, Italy, and California were sequenced and compared using Zin03 as  
121 reference. First, we show that intergenic space drives clonal diversification. As previously  
122 reported, transposable element insertions varied among clones [18]. This report expands that  
123 understanding to implicate methylation as an indirect driver of clonal diversification; rare  
124 somatic heterozygous SNPs were most observed in the repetitive intergenic regions, likely  
125 because of the high levels of transposition-inhibiting methylation and associated transition  
126 mutations that are prevalent there. Second, the data support an important component of Muller's  
127 ratchet [38], that asexually propagated organisms accumulate deleterious mutations. Third,  
128 somatic mutations were relatively scarce in the coding regions of genes relative to introns and  
129 intergenic space, suggesting some degree of negative selection against deleterious mutations.

130

## 131 **Results**

### 132 *Zinfandel genome assembly, annotation, and differences between haplotypes*

133         The clone used for the genome assembly, Zinfandel 03 (Zin03), was acquired by FPS in  
134 1964 from the Reutz Vineyard near Livermore, California that was planted during Prohibition  
135 (1920 – 1933) [52]. Zin03 was sequenced using Single Molecule Real-Time (SMRT; Pacific  
136 Biosciences) technology at ~98x coverage and assembled using FALCON-unzip [53], a diploid-  
137 aware assembly pipeline. The genome was assembled into 1,509 primary contigs (N50 = 1.1

138 Mbp) for a total assembly size of 591 Mbp, similar to the genome size of Cabernet Sauvignon  
139 (590 Mbp) [53] and larger than Chardonnay (490Mb) [19] and PN40024 (487 Mb) [54]. Fifty  
140 two percent of the genome was phased into 2,246 additional phased sequences (haplotigs) where  
141 the homologous chromosomes were distinguishable with an N50 of ~442 kbp (Table 2). A total  
142 of 53,560 complete protein-coding genes were annotated on the primary (33,523 genes) and  
143 haplotig (20,037 genes) assemblies (Table 2).

144 Of the 20,037 genes annotated on the haplotig assembly, 18,878 aligned to the primary  
145 assembly, leaving 1,159 genes that may exist hemizygotously in the genome due to structural  
146 variation between homologous chromosomes or because of substantial divergence in sequence  
147 between haplotypes. These genes were annotated with a broad variety of putative functions,  
148 including biosynthetic processes, secondary metabolism, and stress responses. Long reads were  
149 mapped to both the primary and haplotig assemblies to evaluate the circumstances that explain  
150 the differences between haplotypes. Structural variants (SVs) between the haplotypes were  
151 examined by mapping long SMRT sequencing reads onto Zin03's primary and haplotig  
152 assemblies with NGMLR and calling SVs with Sniffles [55].

153 A total of 22,399 SVs accounted for 6.94% (41.0 / 591 Mbp) of the primary assembly's  
154 length and 6.02% (8.4 / 139 Mbp) of the primary assembly's gene-associated length (Fig. 1a,  
155 Table 3). SVs intersected 4,559 genes in the primary assembly (13.6% of primary assembly  
156 genes) and 390 SVs spanned more than one gene. Manual inspection of the long reads aligned to  
157 the primary assembly support that large, heterozygous deletions and inversions occurred in the  
158 Zin03 genome that were either inherited from different structurally distinct parents or arose  
159 during clonal propagation (Fig. 1b,c,d). Importantly, there was substantial hemizygotosity in the

160 genome, with long reads supporting deletions affecting 2,521 genes and 4.56% of the primary  
161 assembly's length (Table 3).

162 Next, we considered whether specific structural variation could account for the 1,159  
163 genes uniquely found in the haplotig assembly. Three hundred eighty-two genes of the  
164 previously mentioned 1,159 genes that uniquely exist within the haplotig assembly intersected  
165 structural variations. Two hundred ninety of these intersected deletions, accounting for the  
166 failure to identify them on the primary assembly. Some of the haplotig genes that failed to map  
167 to the primary assembly intersected additional types of SVs, including duplications (80 genes),  
168 insertions (89 genes), and inversions (16 genes).

169 These results reveal structural differences between Zinfandel's haplotypes. These  
170 differences could have been inherited and/or could have occurred during clonal propagation.  
171 Overall, these structural variations affected 4,559 primary assembly genes. Importantly, these  
172 data show that a notable portion of the primary assembly's length (4.56%) is hemizygous.

173

#### 174 *Differences in structure and gene content between Zinfandel and other grape genomes*

175 The Zin03 genome was compared to PN40024 and Cabernet Sauvignon to identify  
176 cultivar-specific genes that may contribute to Zinfandel's characteristics. PN40024 is the inbred  
177 line derived from Pinot Noir used to develop the first grape genome reference [54] and Cabernet  
178 Sauvignon (CS08) was recently used to construct the first diploid, haplotype-resolved grape  
179 genome for which long reads are available [53]. Overall, 1,801 genes were not shared between  
180 all three genotypes (Zin03, Pinot Noir, and Cabernet Sauvignon; Fig. 2a). Three hundred nine  
181 protein coding genes were found uniquely in Zin03 relative to PN40024 and CS08; 223 were  
182 annotated on the primary assembly and 86 were annotated on the haplotigs (Fig. 2a, Additional



183 file 2). These genes had a panoply of functions that included but were not limited to nucleotide  
184 binding (60 genes), protein binding (58 genes), stress response (34 genes), and kinases (28), and  
185 were associated with membranes (48 genes), signal transduction (23 genes), carbohydrate  
186 metabolism (12 genes), and lipid metabolism (8 genes; Additional file 2).

187       Structural differences between Zin03 and CS08 were explored in more detail by mapping  
188 the long SMRT reads of CS08 onto Zin03's primary and haplotig assemblies with NGMLR and  
189 calling SVs with Sniffles (Fig. 2b, Table 3). Overall, these SVs corresponded to 17.74% (159/  
190 897 Mbp) of the Zin03 assembly's total length, 12.5% of its total protein-coding regions (28 /  
191 223 Mbp), and 25.6% of all Zin03 genes. SVs affected 9,885 genes in the primary assembly and  
192 3,804 genes in the haplotigs. Manual inspection of the alignment of long CS08 reads to Zin03's  
193 primary assembly support that large SVs exist between the two genotypes (Fig. 2c,d). Next, we  
194 considered whether specific structural variation called by Sniffles could account for the 576  
195 Zin03 genes absent from CS08 according to the reciprocal mapping analysis (Fig. 2a). Of these  
196 576 Zinfandel genes, 268 genes intersected 454 deletions supported by long CS08 reads aligned  
197 to Zin03.

198       Though Zinfandel had few unique genes, high levels of structural variation between  
199 Zinfandel (Zin03) and Cabernet Sauvignon (CS08) were observed and these affected  
200 considerable protein-coding regions of the genome. These results justify constructing a  
201 Zinfandel-specific reference to better capture genomic variability among Zinfandel clones that  
202 could otherwise be missed, particularly if an alternative reference lacks sequences present in  
203 Zinfandel.

204

205 *Relatedness among Zinfandel clones*

206 Fifteen Zinfandel clones, including Zin03, were sequenced using Illumina. The resulting  
207 reads were aligned to the Zin03 primary assembly to characterize SNPs, small INDELs, variable  
208 transposon insertions, and large structural variants. Principal Component Analysis (PCA) of  
209 variants among the clones showed no clear pattern in their relationships to one another based on  
210 their recorded origins prior to acquisition (Fig. 3a). The ambiguity surrounding the travels and  
211 histories of these clones means that it should not be taken for granted that the Californian  
212 selections, for example, ought to be more closely related to one another than to the Italian or  
213 Croatian selections. Notably, Pribidrags 5 and 15, which have a known and close relationship, do  
214 not co-localize in the PCA (Fig. 3a, Table 1).

215 A kinship analysis [56] was then used to quantitatively assess the relationships between  
216 the Zinfandel selections. These values range from zero (unrelated) to 0.5 (self). Additional  
217 cultivars were included in the analysis with known relationships to help contextualize the  
218 differences between clones and the integrity of the analysis (Fig. 3b). Cabernet Franc and Merlot  
219 have a parent - offspring relationship, as do Pinot Noir and Chardonnay [57,58]. These pairs had  
220 kinship coefficients of 0.15 and 0.18, respectively (Fig. 3b). As a possible grandparent of  
221 Sauvignon Blanc, Pinot Noir had a kinship coefficient of 0.05 with Sauvignon blanc [59,60].  
222 Zinfandel selections had kinship coefficients between 0.42 and 0.45; this is likely because of the  
223 accrual of somatic mutations among clones (Fig. 3b).

224 Across the Zinfandel clones, the median number of homozygous and heterozygous  
225 variants called relative to Zin03 were 37,437 and 718,174, respectively. Between 10-fold and 27-  
226 fold more heterozygous variants were called than homozygous variants in each clone, and less  
227 than 10% of sites did not share the Zin03 reference allele (Additional file 3).

228

229 *Clonal versus cultivar genetic variability*

230 Overall, an average of 761,948 variant sites were identified in individual Zinfandel clones  
231 when short reads were mapped on the Zin03 primary assembly. On average, 6,153,830 variant  
232 sites were identified in other cultivars (Pinot noir, Chardonnay, Sauvignon Blanc, Merlot,  
233 Cabernet Franc) relative to Zin03 (Additional file 3). Both of these figures excluded  
234 heterozygous sites at which the diploid genotype called for a given sample was identical to that  
235 called for Zin03.

236 Variants were 7.9X more frequent in other cultivars relative to Zin03 than for Zinfandel  
237 clones; on average, mutations in clones occurred once every 723 bases and once every 92 bases  
238 in other cultivars (Additional file 3). However, the ratio of transitions to transversion mutations  
239 and the proportions of the severities of the predicted variant effects were similar for both groups  
240 (Additional file 3). The normalized count of variants differed between cultivars and Zinfandel  
241 clones on the basis of variants' location in the genome, the type of variant, and the zygosity of  
242 the variant (Fig. 4).

243 Variants in non-Zinfandel cultivars and heterozygous variants among Zinfandel clones  
244 were significantly more prevalent in intergenic space than introns and exons and significantly  
245 more prevalent in introns than exons (Tukey HSD,  $p < 0.01$ ). Unlike homozygous variants  
246 between cultivars and as expected, homozygous variants were rare among clones (Fig. 4,  
247 Additional file 3). Still, the normalized count of homozygous INDELs in intergenic space,  
248 introns, and exons were significantly different among Zinfandel clones (Tukey HSD,  $p < 0.01$ ),  
249 as were the normalized count of homozygous intergenic versus genic (exons and introns) SNPs  
250 (Tukey HSD,  $p < 0.01$ ). The normalized count of homozygous SNPs in exons and introns were  
251 not significantly different in Zinfandel clones (Tukey HSD,  $p > 0.01$ ). The accrual of

252 predominantly heterozygous and likely recessive variants [2] is consistent with what would be  
253 expected given physically separate homologous chromosomes and the absence of sexual  
254 reproduction. The differences in mutation abundances observed were initially surprising; if  
255 somatic mutations occurred randomly and absent mechanisms that make certain sites more or  
256 less susceptible to mutation, then different regions of the genome should have had equal levels of  
257 mutations. This was not the case (Figure 5).

258

### 259 *The accrual of somatic mutations in Zinfandel clones*

260 Heterozygous sites found among the 15 Zinfandel clones ought to be a mixture of sites  
261 inherited from their shared ancestral plant and somatic mutations that arose during clonal  
262 propagation. To better understand the nature of somatic mutations, the data were handled slightly  
263 differently than they were to construct Figure 4; all 15 Zinfandel clones were included and all  
264 heterozygous calls were considered, even if all genotypes were identically heterozygous. Thirty  
265 percent of heterozygous SNPs, 24% of heterozygous INDELs, and 47% of heterozygous  
266 structural positions were shared by all 15 Zinfandel clones (Fig. 5a). Because all clones are  
267 identically heterozygous at these loci, these variants are those inherited from Zinfandel's parents.

268 Individual and subsets of Zinfandel clones accumulated heterozygous mutations as clonal  
269 propagation occurred (Fig. 5a). Thirteen percent and 16% of heterozygous INDELs and SNPs,  
270 respectively, and 1% of large (>50 bp) structural variants occurred in only one or two clones  
271 (Fig. 5a). The distribution of SVs called by Delly is markedly different than those of SNPs and  
272 INDELs (Fig. 5a). For both SNPs and INDELs, there were 3 and 3.5-fold as many heterozygous  
273 variants shared by all 15 clones as there were uniquely occurring variants; there were 71.5-fold  
274 more structural variants shared by all clones than there were unique variants in individual clones

275 (Fig. 5a). This might imply that the mechanisms that give rise to small mutations are more  
276 common among clones than the large-scale changes associated with SVs.

277 The distribution of unique and shared heterozygous INDELs in exons, introns, repetitive,  
278 and non-repetitive intergenic spaces were not equal (Fig. 5b). The distribution of INDELs in  
279 exons was significantly different than the distributions of INDELs in each other feature  
280 considered (Kolmogorov-Smirnov Test,  $p < 0.01$ ). Similarly, the distributions SNPs in genic  
281 (exons, introns) and intergenic (repetitive, non-repetitive) regions were not equal (Fig. 5b).  
282 Shared heterozygous SNPs were most common in intergenic non-repetitive regions and introns  
283 and least common in exons and repetitive intergenic regions (Fig. 5b). Interestingly, unique  
284 heterozygous SNPs occurred at high rates in repetitive intergenic regions (Fig. 5b).

285 That shared heterozygous sites are mostly in non-repetitive intergenic space and unique  
286 heterozygous sites are mostly in repetitive space may have to do with the increased likelihood  
287 that methylated cytosines spontaneously deaminate and the prevalence of methylated repetitive  
288 sequences in those regions [22,25,29,30]. This is also supported by the significantly higher ratio  
289 of transitions to transversions in repetitive intergenic regions than in exons, introns, and non-  
290 repetitive intergenic space (Fig. 5c). Furthermore, the mean percentage of CpG, CHG, and CHH  
291 sites affected by transition mutations was significantly higher in repetitive intergenic space than  
292 genic and non-repetitive intergenic spaces (Fig. 5d; Tukey HSD,  $p < 0.01$ ). The mean percentage  
293 of CpG sites affected by transition mutations was also significantly higher in introns than exons  
294 (Tukey HSD,  $p < 0.01$ ). Compatible with this hypothesis, INDELs, which should not increase in  
295 frequency due to methylation, did not occur preferentially in repeats (Fig. 5b).

296 The impact of specific variants also varied with their prevalence among the clones (Fig.  
297 5e). “High impact” mutations were predicted by SNPEff [61]. The high impact mutations

298 identified in these data included exon losses, start and stop site gains and losses, frameshifts,  
299 gene fusions, splice acceptor mutations, and splice donor mutations. These mutations are  
300 predicted to be deleterious because of their disruptive effects on the coded protein. For these  
301 reasons, we designated such mutations as putatively deleterious in this manuscript. These were  
302 counted for each Zinfandel clone relative to Zin03. Relatively low proportions of heterozygous  
303 variants shared by all Zinfandel clones were putatively deleterious. In contrast, larger proportions  
304 of exonic SNPs and INDELs that occurred in individual or subsets of clones were putatively  
305 deleterious (Fig. 5e).

306 Together, these results show that mutations associated with clonal propagation are most  
307 numerous outside of coding regions of the genome, indicating that clone genomes diversify most  
308 rapidly in the intergenic space, particularly in repetitive and likely methylated regions (Fig. 5).  
309 Though a minority of somatic mutations occurred in exons, we show that exonic mutations that  
310 occur in few or individual clones are more often deleterious than exonic heterozygous variants  
311 shared by all or most clones. In other words, clonal propagation is associated with the  
312 accumulation of putatively deleterious heterozygous mutations.

313

#### 314 *Zinfandel clones incur unique transposon insertions*

315 Transposable element insertions (TEI) contribute to somatic variation in grape  
316 [6,11,12,18]. Relative to Zin03, 1,473 TEI were identified among the Zinfandel clones. A large  
317 fraction of TEI (26.7%) occurred uniquely in individual clones (Fig. 6a) and included 325  
318 retrotransposons, mostly Copia and Gypsy LTRs, and 69 DNA-transposons (Fig. 6b). Because  
319 uniform loci are excluded, in-common TEI were not captured when clones were compared to  
320 Zin03. Comparing the clones relative to PN40024, however, revealed that the majority (64.8%)

321 of TEI were shared among the 15 Zinfandel clones. Five hundred thirty TEI occurred in only  
322 one, two or three clones (Fig. 6a). This result supports the derivation of these selections from a  
323 common ancestral plant and the accumulation of somatic variations over time.

324 In addition to being suggestive of their shared heritage, the positions of these insertions  
325 and their proximity to coding genes were notable. Three-hundred forty-seven TEI occurred  
326 within 314 coding genes. The remaining 938 TEIs were in intergenic regions (Fig. 6c). The  
327 median upstream and downstream distance of intergenic TEs from the closest feature were  
328 11,811 and 11,279 base-pairs, respectively, and 25% of TEI were less than 4,345 bases  
329 downstream of the closest feature and/or less than 3,826 bases upstream of the closest feature  
330 (Fig. 6c).

331

## 332 **Discussion**

333 Consideration of the genomic differences among Zinfandel clones revealed what is likely  
334 a complex history not easily reconstructed. Analyses of the relationships between clones did not  
335 reveal groupings of clones per their recorded countries of origin. Somatic mutations may help  
336 identify individual clones but could also blur the historical relationships between them. It is also  
337 plausible that pairs of clones from any given region are not direct cuttings of one another but of  
338 Zinfandels from another region; the clones now grown in California, for example, may have been  
339 imported on numerous independent occasions from various other regions, meaning some may  
340 indeed be more closely related to one of the Primitivo or Croatian clones than they are to other  
341 Californian clones. It would be unwise to assume a single migratory path radiating from an  
342 ancestral mother plant ought to be applicable to the clones.

343           Despite this ambiguity, the examination of SNPs, INDELS, transposable elements and  
344 other structural variants all support the derivation of all but one of the clonal selections from a  
345 common ancestral Zinfandel mother plant and show the accumulation of somatic mutations over  
346 time (Figs. 5 and 6). The structure of the Zinfandel genome, location of mutations among clones,  
347 their frequency and prevalence, and the relationship between these factors provides some insight  
348 into the nature of mutations in clonally propagated plants. Mutations among clones were  
349 predominantly heterozygous (Fig. 4) and uncommon heterozygous mutations shared by a subset  
350 of or individual clones were increasingly deleterious when they occurred in exons (Fig. 5e).

351           There are costs and benefits associated with clonal propagation [16]. Among the benefits  
352 are that the plants need not breed true-to-type; clonal propagation generally fixes heterozygous  
353 loci and valuable phenotypes. However, the increase in the proportion of deleterious alleles  
354 supports Muller's ratchet, which posits that sex is advantageous and that clonal propagation  
355 increases mutational load [38]. Though these and previous data do not tell which mutations are  
356 actually recessive or dominant, they could remain hidden if they are recessive or do not manifest  
357 their deleterious effects [2,62]. However, even after taking into consideration the total length of  
358 exons, introns, and intergenic space (repetitive and non-repetitive), heterozygous mutations  
359 occurred at varying frequency in these regions and were least abundant in coding regions. The  
360 rarity of mutations in exons and commonality of mutations in repetitive intergenic space may  
361 have at least two components.

362           Mutations are likely more frequent in repetitive intergenic space as a result of the  
363 regulation of transposition by DNA methylation. Repetitive intergenic space had the highest rate  
364 of relatively unique SNPs and the ratio of transitions to transversions was significantly higher  
365 there than in other regions. DNA methylation is an important epigenetic control and is one



366 mechanism that maintains genome stability and impairs the transposition of mobile elements  
367 [29,63,64]. Methylated cytosines, however, spontaneously deaminate faster than unmethylated  
368 cytosines [24,30]. Together, the expectations that intergenic regions are rich in transposable  
369 elements, that these regions are typically highly methylated and as a result will experience  
370 greater transition rates account for the high rates of SNPs in repetitive intergenic spaces among  
371 Zinfandel clones. Also notable, these data show that some transposable elements are not entirely  
372 silenced, with a substantial number inserting in genes or in close proximity to genes (Fig. 6c).  
373 These insertions could be effectively inconsequential or not; transposable element insertions can  
374 result in novel transcripts and affect gene expression regulation [11,65]. Gene body methylation  
375 is appreciated as a mutagenic “double-edged sword” [66], with benefits coming at the price.  
376 Recent work observed region-specific methylation in vegetatively propagated Sardinian white  
377 poplar that may serve an advantageous function [67] and others have suggested that the  
378 epigenome contributes to the success of vegetatively propagated plants [68]. Future work might  
379 also consider the long-term price associated with intergenic mutagenesis and the potential loss of  
380 methylation in vegetatively propagated plants.

381         The rarity of exonic mutations was surprising. After accounting for the length of these  
382 spaces in the genome and their repetitiveness, we expected uniform rates of mutation in exons,  
383 introns, and intergenic space. Instead, we observed that although rare somatic mutations in exons  
384 were increasingly deleterious, they were relatively scarce. Some degree of negative selection  
385 against deleterious variants in coding regions could explain why mutations were less frequent in  
386 coding than noncoding regions of the genome. The possibility of diplontic, clonal selection or  
387 competition between cell lineages that could purge otherwise consequential deleterious  
388 mutations has been modeled, but evidence of its occurrence is sparse [16,34,39]. The structures

389 of apical meristems [35,69] and the tendency of somatic mutations to be heterozygous and  
390 recessive [2] place constraints on the likelihood that deleterious mutations would be subjected to  
391 negative selection. Periclinal divisions across cell layers could enhance diplontic selection [34]  
392 against dominant and/or hemizygous recessive alleles. Four and one half of Zinfandel's genome  
393 is hemizygous; structural variations identified within the Zinfandel genome and the rampant  
394 hemizygoty reported in Chardonnay [10] could also expose otherwise hidden somatic  
395 variations to selective pressure hostile to the accumulation of deleterious mutations. Additional  
396 work should explore to what degree each of these factors, or others not considered here, explain  
397 why somatic mutations in exons were relatively infrequent and characterize the realized long-  
398 term consequences of mutation accumulation versus selection for grapevine and other clonally  
399 propagated plants.

400

## 401 **Conclusions**

402 This study described the nature of the mutations causing the diversification of 15 clonally  
403 propagated grapevines and confirm their derivation from a single ancestral mother Zinfandel.  
404 The findings indicate that repetitive intergenic space, likely because of its higher rates of  
405 methylation in plants, is a significant contributor to the pool of mutations differentially observed  
406 among the clones. In addition, the analyses revealed that though relatively infrequent compared  
407 to intergenic mutations, mutations in exons were increasingly deleterious the less common they  
408 were among Zinfandel clones. This result is consistent with the expectation that vegetative  
409 propagation is associated with the accrual of mutations and adds that negative selection may  
410 simultaneously purge mutations from the genome. These findings add novel insight and nuance  
411 to our understanding of the nature and fates of mutations during vegetative propagation.

412

## 413 **Methods**

### 414 *Zinfandel plant material and additional accessions*

415           Fifteen Zinfandel clones were used for this study. Plants were confirmed to be clones of  
416 Zinfandel using the following microsatellite markers: VVMD5, VVMD7, VVMD27, VVMD31,  
417 VVMD32, VVMS2, VRZAG62, and VRZAG79 [44,70,71]. Fourteen of these clones are  
418 available through Foundation Plant Services (FPS) at the University of California Davis. Nine of  
419 the fifteen clones belong to the Zinfandel Heritage Vineyard Project, a collection of rare  
420 Zinfandel vine cuttings grown in the same vineyard. The identification numbers, common  
421 names, and source of the clones used in this study are listed in Table 1. An FPS identification  
422 number suffix of “.1” indicates that the clone underwent microshoot tip tissue culture therapy,  
423 with two exceptions. Pribidrag 13 and Pribidrag 15 are directly derived from the same plants as  
424 Pribidrag 4 and Pribidrag 5, respectively, but did not undergo microshoot tip tissue culture  
425 therapy. They are labeled with identical FPS numbers to make clear that the relationship between  
426 them is known. In this manuscript, Zinfandel clones will be referred to by the clone numbers and  
427 common names listed in Table 1.

428

### 429 *DNA extraction, library preparation, and sequencing*

430           High quality genomic DNA was isolated from grape leaves using the method described in  
431 Chin *et al.* (2016) [53]. DNA purity was evaluated with a Nanodrop 2000 spectrophotometer  
432 (Thermo Scientific, Hanover Park, IL), quantity with a Qubit 2.0 Fluorometer (Life  
433 Technologies, Carlsbad, CA) and integrity by electrophoresis. For SMRT sequencing, SMRTbell  
434 libraries for the Zinfandel reference FPS clone 03 (Zin03) were prepared as described by Chin *et*

435 *al.* (2016). For Illumina sequencing, DNA sequencing libraries for each of the fifteen Zinfandel  
436 clones were prepared using the Kapa LTP library prep kit (Kapa Biosystems) as described by  
437 Jones *et al.*, (2014) [72]. Final libraries were evaluated for quantity and quality using a  
438 Bioanalyzer 2100 (Agilent Technologies, CA). Zin03 SMRTbell libraries were sequenced on a  
439 PacBio RS II and Illumina libraries were sequenced in 100 and 150 base-pair paired-end reads  
440 on an Illumina HiSeq3000 sequencer (DNA Technology Core Facility, University of California,  
441 Davis). Genome sequences of additional *V. vinifera* were used in this study, including long reads  
442 from Cabernet sauvignon (NCBI BioProject PRJNA316730) and short reads from Cabernet  
443 franc, Chardonnay, Merlot, Pinot Noir, and Sauvignon blanc (NCBI BioProject PRJNA527006).  
444

#### 445 *Zinfandel genome assembly and annotation*

446 *De novo* assembly of Zinfandel (Zin03) was performed at DNAnexus (Mountain View,  
447 CA, USA) using PacBio RS II data and the FALCON-unzip (v. 1.7.7) pipeline [53]. FALCON-  
448 unzip was used for its ability to assemble contiguous, phased diploid genomes with better  
449 resolved heterozygosity [53,73]. Repetitive sequences were masked prior to error correction  
450 using TANmask and REPmask modules in Damasker [74]. After error-correction (13,073 bp  
451 length cut-off), a total of 1.68 million error-corrected reads (N50 15Kbp, 29-fold coverage of  
452 expected genome size) were obtained and repeats were masked before overlap detection in the  
453 FALCON pipeline (v. 1.7.7). PacBio reads were assembled after testing multiple parameters to  
454 produce the least fragmented assembly. These conditions are listed in Additional file 4.  
455 Haplotype reconstruction was performed with default parameters. Finally, contigs were polished  
456 with Quiver (Pacific Biosciences, bundled with FALCON-unzip v. 1.7.7). Repeats were

457 annotated on the Zin03 assembly using RepeatMasker (v. open-4.0.6) [75] and a *V. vinifera*  
458 repeat library [76].

459         The publicly available RNAseq datasets listed in Additional file 4 were used as  
460 transcriptional evidence for gene prediction. Each RNAseq sample was trimmed with  
461 Trimmomatic (v. 0.36; Additional file 4) and assembled with Stringtie (v. 1.3.3) [77] to  
462 reconstruct variety-specific transcripts. A detailed list of all experimental data used for the  
463 annotation procedure is in Additional file 4. This data was then mapped on the genome using  
464 Exonerate (v. 2.2.0, transcripts and proteins) [78] and PASA (v. 2.1.0, transcripts) [79].  
465 Alignments, and *ab initio* predictions generated with SNAP (v. 2006-07-28) [80], Augustus [81],  
466 and GeneMark-ES [82] were used as input for EVidenceModeler (v. 1.1.1) [83].  
467 EVidenceModeler was used to identify consensus gene structures using the weight reported in  
468 Additional file 4. Functional annotation was performed using the RefSeq plant protein database  
469 (<ftp://ftp.ncbi.nlm.nih.gov/refseq>, retrieved January 17th, 2017) and InteProScan (v. 5) as  
470 previously described [76].

471

#### 472 *Genetic variant calling*

473         Comparisons between Zinfandel clones and between Zin03 and other cultivars were  
474 made using the Zin03 genome as reference. This pipeline is described in Additional file 5. Small  
475 insertions and deletions (INDELs), single nucleotide polymorphisms (SNPs), and structural  
476 variations (SVs) were analyzed. The short Illumina reads belonging to the fifteen Zinfandel  
477 clones and additional cultivars were trimmed using Trimmomatic (v. 0.36; Additional file 4).  
478 Quality filtered and trimmed paired-end reads were then randomly down-sampled to 84 million  
479 (~14X coverage) in each library to mitigate the possibility of sequencing depth-dependent

480 outcomes. All libraries were aligned to Zin03 using bwa (v. 0.7.10) and the -M parameter [84].  
481 For all genotypes, the median number of reads mapping to the Zinfandel reference genome was  
482 97%. Next, Picard Tools (v. 2.12.1) were used to mark optical duplicates, build BAM indices,  
483 and validate SAM files (<http://broadinstitute.github.io/picard>). Variants were called using  
484 GATK's HaplotypeCaller (v. 3.5) [85]. Then, called variants were filtered and annotated (--  
485 filterExpression "QD < 2.0 || FS > 60.0 || MQ < 40.0 || MQRankSum < -12.5 || ReadPosRankSum  
486 < -8.0"). Variant call files were combined using GATK's GenotypeGVCFs. Having mapped  
487 Illumina reads corresponding to the Zinfandel reference onto itself, erroneous non-reference  
488 Zin03 calls (8.1%) were removed. The variants called included SNPs and INDELS.

489         Next, large structural variations among clones, between Zin03 and other cultivars, and  
490 between Zin03's haplotypes were studied. First, Zin03 genes were compared to PN40024 and  
491 Cabernet Sauvignon (CS08) by mapping coding sequences on genome assemblies using Gmap  
492 (v. 2015-09-29) and the following parameters: -K 20,000 -B 4 -f 2. Hits with at least 80%  
493 identity and reciprocal coverage are reported. Genes annotated on Zin03's haplotig assembly  
494 were also mapped to Zin03's primary assembly to assess differences in gene content between  
495 Zin03's haplotypes. SMRT reads from Zin03 and CS08 were mapped to Zin03 using NGMLR  
496 (v. 0.2.7) and structural differences were called with Sniffles (v.1.0.8) [55]. Zinfandel clones  
497 were compared to one another using Illumina short reads and Delly (v. 0.7.8) with default  
498 parameters [86]. The structural variations identified by Sniffles and Delly in Zin03 were  
499 intersected. Several filters were applied to the results of SV analyses. Transversions, non-  
500 reference Zin03 genotype calls, SVs annotated at the ends of contigs, and SVs that intersected  
501 the repeat annotation were filtered from Delly output.

502

503 *Transposon insertion analysis*

504 PoPoolationTE2 (v. 1.10.04) [87] was used to identify transposon insertions in the  
505 Zinfandel clones; it was used following the workflow outlined in its software manual  
506 (<https://sourceforge.net/p/popoolation-te2/wiki/Manual/>). Insertions were called relative to Zin03  
507 genome assembly and PN20024 [54]. As described in Kofler *et al.* (2016), PoPoolationTE2  
508 analyses transposable element insertions and can identify novel and annotated TE insertions  
509 provided insertions fall within predefined families of TEs. The annotation produced by  
510 RepeatMasker was used for the analysis. In this manuscript, the TE insertions among the clones  
511 are reported using the classification system and nomenclature described by Wicker *et al.* (2007)  
512 [88]. In instances where the TE order and/or superfamily was not annotated, only the TE class  
513 and order, when available, are named in the associated figures and text.

514

515 *Relationships between Zinfandel clones*

516 The relationships between Zinfandel clones were visualized by Principal Component  
517 Analysis and their relatedness was quantified (VCFtools v. 0.1.15) based on the method  
518 described by Manichaikul *et al.* (2010) [56]. This approach gives information about the  
519 relationship of any pair of individuals (unrelated, 3<sup>rd</sup> degree relative, 2<sup>nd</sup> degree relative, full  
520 siblings, and self) by estimating their kinship coefficient, which ranges from zero (no  
521 relationship) to 0.50 (self). These analyses used SNPs outside of repetitive regions.

522

523 **List of abbreviations**

524 ZAP, Zinfandel Advocates and Producers; UC, University of California; FPS, Foundation Plant  
525 Services; SMRT, Single Molecule Real-Time; Zin03, Zinfandel 03; CS08, Cabernet Sauvignon

526 08; PCA, Principal component analysis; TEI, Transposable Element Insertions; SV, Structural  
527 variant; INDEL, Insertion/Deletion; SNP, Single Nucleotide Polymorphism

528

### 529 *Funding*

530 This work was partially supported by start-up funds from the College of Agricultural and  
531 Environmental Sciences (UC Davis) to DC, the Louis P. Martini Endowment in Viticulture to  
532 DC and the NSF PGRP grant #1741627 to DC, MAW, and BG.

533

### 534 *Author contributions*

535 AMV, MAW, BG, and DC designed the experiments. BBU, YZ, MMA, and RFB  
536 collected the biological material and generated the data. MAP carried out the chemical analysis  
537 of the clones. AMV, AM, YZ, DS, DL, and LKE analyzed the data. AMV and DC prepared the  
538 figures and wrote the manuscript. All authors contributed to the final version of the manuscript.  
539 All authors read and approved the final manuscript.

540

### 541 *Acknowledgements*

542 We are grateful for the vision of the late James A. Wolpert, who established the original  
543 Zinfandel clone trials with the support of the Zinfandel Advocates and Producers (ZAP).

544

### 545 **References**

546 1. Riaz S, Garrison KE, Dangl GS, Boursiquot J-M, Meredith CP. Genetic divergence and  
547 chimerism within ancient asexually propagated winegrape cultivars. *J Amer Soc Hort Sci.*  
548 2002;127:508–14.



- 549 2. Zhou Y, Massonnet M, Sanjak JS, Cantu D, Gaut BS. Evolutionary genomics of grape (*Vitis*  
550 *vinifera* ssp. *vinifera*) domestication. PNAS. 2017;114:11715–20.
- 551 3. Franks T, Botta R, Thomas MR. Chimerism in grapevines: implications for cultivar identity,  
552 ancestry and genetic improvement. Theor. Appl. Genet. 2002;104:192–9.
- 553 4. Ramu P, Esuma W, Kawuki R, Rabbi IY, Egesi C, Bredeson JV, *et al.* Cassava haplotype map  
554 highlights fixation of deleterious mutations during clonal propagation. Nat Genet. Nature  
555 Publishing Group; 2017;49:959–63.
- 556 5. Boss PK, Thomas MR. Association of dwarfism and floral induction with a grape “green  
557 revolution” mutation. Nature. 2002;416:847–50.
- 558 6. Kobayashi S, Goto-Yamamoto N, Hirochika H. Retrotransposon-induced mutations in grape  
559 skin color. Science. 2004;304:982.
- 560 7. Walker AR, Lee E, Robinson SP. Two new grape cultivars, bud sports of Cabernet Sauvignon  
561 bearing pale-coloured berries, are the result of deletion of two regulatory genes of the berry  
562 colour locus. Plant Mol Biol. Kluwer Academic Publishers; 2006;62:623–35.
- 563 8. Yakushiji H, Kobayashi S, Goto-Yamamoto N, Tae Jeong S, Sueta T, Mitani N, *et al.* A skin  
564 color mutation of grapevine, from black-skinned Pinot Noir to white-skinned Pinot Blanc, is  
565 caused by deletion of the functional *VvmybA1* allele. Biosci. Biotechnol. Biochem.  
566 2006;70:1506–8.
- 567 9. Pelsy F, Dumas V, Bévillacqua L, Hocquigny S, Merdinoglu D. Chromosome Replacement  
568 and Deletion Lead to Clonal Polymorphism of Berry Color in Grapevine. PLoS Genet. 2015;11.

- 569 10. Zhou Y, Minio A, Massonnet M, Solares E, Lyu Y, Beridze T, *et al.* Structural variants,  
570 clonal propagation, and genome evolution in grapevine (*Vitis vinifera*). bioRxiv. 2018. pp. 1–48.
- 571 11. Fernandez L, Torregrosa L, Segura V, Bouquet A, Martínez-Zapater JM. Transposon-  
572 induced gene activation as a mechanism generating cluster shape somatic variation in grapevine.  
573 *The Plant Journal*. 2010;61:545–57.
- 574 12. Fernandez L, Chaïb J, Zapater JMM, Thomas MR, Torregrosa L. Misexpression of a  
575 PISTILLATA-like MADS box gene prevents fruit development in grapevine. *The Plant*  
576 *Journal*. 2013;73:918–28.
- 577 13. Whitham TG, Slobodchikoff CN. Evolution by Individuals, Plant-Herbivore Interactions, and  
578 Mosaics of Genetic Variability: The Adaptive Significance of Somatic Mutations in Plants.  
579 *Oecologia*. 1981;49:287–92.
- 580 14. Soost RK, Cameron JW, Bitters WP, Platt RG. Citrus bud variation, old and new. *Calif*  
581 *Citrograph*. 1961;46:188–93.
- 582 15. Farcuh M, Li B, Rivero RM, Shlizerman L, Sadka A, Blumwald E. Sugar metabolism  
583 reprogramming in a non-climacteric bud mutant of a climacteric plum fruit during development  
584 on the tree. *Journal of Experimental Botany*. 2017;68:5813–28.
- 585 16. McKey D, Elias M, Pujol B, Duputié A. The evolutionary ecology of clonally propagated  
586 domesticated plants. *New Phytologist*. 2010;186:318–32.

- 587 17. Gambino G, Molin AD, Boccacci P, Minio A, Chitarra W, Avanzato CG, *et al.* Whole-  
588 genome sequencing and SNV genotyping of “Nebbiolo” (*Vitis vinifera* L.) clones. Scientific  
589 Reports. 2017;7:1–15.
- 590 18. Carrier G, Le Cunff L, Dereeper A, Legrand D, Sabot F, Bouchez O, *et al.* Transposable  
591 Elements Are a Major Cause of Somatic Polymorphism in *Vitis vinifera* L. PLoS ONE. 2012;7.
- 592 19. Roach MJ, Johnson DL, Bohlmann J, van Vuuren HJJ, Jones SJM, Pretorius IS, *et al.*  
593 Population sequencing reveals clonal diversity and ancestral inbreeding in the grapevine cultivar  
594 Chardonnay. PLoS Genet. 2018;14.
- 595 20. Carbonell-Bejerano P, Royo C, Torres-Pérez R, Grimplet J, Fernandez L, Franco-Zorrilla  
596 JM, *et al.* Catastrophic unbalanced genome rearrangements cause somatic loss of berry color in  
597 grapevine. Plant Physiology. 2017;175:786–801.
- 598 21. Plomion C, Aury J-M, Amselem J, Leroy T, Murat F, Duplessis S, *et al.* Oak genome reveals  
599 facets of long lifespan. Nature Plants. 2018;4:440–52.
- 600 22. Ossowski S, Schneeberger K, Lucas-Lledó JI, Warthmann N, Clark RM, Shaw RG, *et al.*  
601 The Rate and Molecular Spectrum of Spontaneous Mutations in *Arabidopsis thaliana*. Science.  
602 2010;327:92–4.
- 603 23. Hershberg R, Petrov DA. Evidence That Mutation Is Universally Biased towards AT in  
604 Bacteria. PLoS Genet. 2010;6.
- 605 24. Selker EU. Premeiotic instability of repeated sequences in *Neurospora crassa*. Annu. Rev.  
606 Genet. 1990;24:579–613.

- 607 25. Meunier J, Khelifi A, Navratil V, Duret L. Homology-Dependent Methylation in Primate  
608 Repetitive DNA. PNAS. 2005;102:5471–6.
- 609 26. Mautino MR, Rosa AL. Analysis of Models Involving Enzymatic Activities for the  
610 Occurrence of C-T Transition Mutations During Repeat-Induced Point Mutation (RIP) in  
611 *Neurospora crassa*. J theor Biol. 1998;192:61–71.
- 612 27. Schlötterer C, Tautz D. Slippage synthesis of simple sequence DNA. Nucleic Acids  
613 Research. 1992;20:211–5.
- 614 28. Qi Y, He X, Wang X-J, Kohany O, Jurka J, Hannon GJ. Distinct catalytic and non-catalytic  
615 roles of ARGONAUTE4 in RNA-directed DNA methylation. Nature. 2006;443:1008–12.
- 616 29. Shen H, He H, Li J, Chen W, Wang X, Guo L, *et al.* Genome-Wide Analysis of DNA  
617 Methylation and Gene Expression Changes in Two Arabidopsis Ecotypes and Their Reciprocal  
618 Hybrids. The Plant Cell. 2012;24:875–92.
- 619 30. Cantu D, Vanzetti LS, Sumner A, Dubcovsky M, Matvienko M, Distelfeld A, *et al.* Small  
620 RNAs, DNA methylation and transposable elements in wheat. BMC Genomics. 2010;11.
- 621 31. Chan SW-L, Henderson IR, Jacobsen SE. Gardening the genome: DNA methylation in  
622 *Arabidopsis thaliana*. Nat Rev Genet. 2005;6:351–60.
- 623 32. Thompson MM, Olmo HP. Cytohistological Studies of Cytochimeric and Tetraploid Grapes.  
624 American Journal of Botany. 1963;50:901–6.
- 625 33. Hocquigny S, Pelsy F, Dumas V, Kindt S, Heloir M-C, Merdinoglu D. Diversification within  
626 grapevine cultivars goes through chimeric states. Genome. 2004;47:579–89.

- 627 34. Klekowski EJ. Plant clonality, mutation, diplontic selection and mutational meltdown.  
628 *Biological Journal of the Linnean Society*. 2003;79:61–7.
- 629 35. Klekowski EJ, Kazarinova-Fukshansky N, Mohr H. Shoot Apical Meristems and Mutation -  
630 Stratified Meristems and Angiosperm Evolution. *American Journal of Botany*. 1985;72:1788–  
631 800.
- 632 36. Tilney-Bassett RAE. *Plant chimeras*. Edward Arnold (Publishers) Ltd.; 1986.
- 633 37. Klekowski EJ. Mutation rates in mangroves and other plants. *Genetica* 1998;102/103:325–  
634 31.
- 635 38. Muller HJ. Some genetic aspects of sex. *The American Naturalist*. 1932;66:118–38.
- 636 39. Pineda-Krch M, Fagerström T. On the potential for evolutionary change in meristematic cell  
637 lineages through intraorganismal selection. *Journal of Evolutionary Biology*. 1999;12:681–8.
- 638 40. Orive ME. Somatic Mutations in Organisms with Complex Life Histories. *Theoretical*  
639 *Population Biology*. 2001;59:235–49.
- 640 41. CDFA. *Grape Crush Report, Final 2016 Crop*. 2016;1-5.
- 641 42. CDFA. *California Grape Crush Report Preliminary 2015*. 2016;1-141.
- 642 43. Bowers JE, Bandman EB, Meredith CP. DNA Fingerprint Characterization of Some Wine  
643 Grape Cultivars. *AJEV*. 1993;44:266–74.
- 644 44. Maletic E, Pejic I, Karoglan Kontic J, Piljac J, Dengl G, Vokurka A, *et al*. The Identification  
645 of Zinfandel on the Dalmatian Coast of Croatia. *Acta Hort*. 2003;603:251–4.

- 646 45. Mirošević N, Meredith CP. A review of research and literature related to the origin and  
647 identity of the cultivars Plavac mali, Zinfandel and Primitivo (*Vitis vinifera* L.). Acta Hort.  
648 2000;65:45–9.
- 649 46. Maletic E, Pejic I, Kontic JK, Piljac J, Dangl GS, Vokurka A, *et al.* Zinfandel, Dobricic, and  
650 Plavac mali: The genetic relationship among three cultivars of the Dalmatian Coast of Croatia.  
651 AJEV. 2004;55:174–80.
- 652 47. Fanizza G, Lamaj F, Ricciardi L, Resta P, Savino V. Grapevine cvs Primitivo, Zinfandel and  
653 Crljenak kastelanski: Molecular analysis by AFLP. Vitis. 2005;44:147–8.
- 654 48. Russo G, Liuzzi V, D'Andrea L, Alviti G. Comparison among Five Clones of “Primitivo”  
655 Vine in Southern Italy. Hajdu E, Borbas E, editors. Acta Hort. 2003;603:779–86.
- 656 49. Wolpert JA. Performance of Zinfandel and Primitivo Clones in a Warm Climate. AJEV.  
657 1996;47:124–6.
- 658 50. Fidelibus MW, Christensen LP, Katayama DG, Verdenal P-T. Performance of Zinfandel and  
659 Primitivo grapevine selections in the central San Joaquin Valley, California. AJEV.  
660 2005;56:284–6.
- 661 51. Zdunić G, Simon S, Malenica N, Budić-Leto I, Maletic E, Karoglan Kontić J, *et al.*  
662 Intravarietal variability of Crljenak Kastelanski' and Its Relationship with 'Zinfandel' and  
663 'Primitivo' Selections. Acta Hort. 2014;1046:573–80.
- 664 52. Sweet NL, Wolpert JA. The Zinfandels of FPS. FPS Grape Program Newsletter. 2007;10–9.

- 665 53. Chin C-S, Peluso P, Sedlazeck FJ, Nattestad M, Concepcion GT, Clum A, *et al.* Phased  
666 diploid genome assembly with single-molecule real-time sequencing. *Nat Meth.* 2016;13:1050–  
667 4.
- 668 54. Jaillon O, Aury J-M, Noel B, Policriti A, Clepet C, Casagrande A, *et al.* The grapevine  
669 genome sequence suggests ancestral hexaploidization in major angiosperm phyla. *Nature.*  
670 2007;449:463–7.
- 671 55. Sedlazeck FJ, Rescheneder P, Smolka M, Fang H, Nattestad M, Haeseler A, *et al.* Accurate  
672 detection of complex structural variations using single-molecule sequencing. *Nat Meth.*  
673 2018;15:461–8.
- 674 56. Manichaikul A, Mychaleckyj JC, Rich SS, Daly K, Sale M, Chen W-M. Robust relationship  
675 inference in genome-wide association studies. *Bioinformatics.* 2010;26:2867–73.
- 676 57. Boursiquot J-M, Lacombe T, Laucou V, Julliard S, Perrin FX, Lanier N, *et al.* Parentage of  
677 Merlot and related winegrape cultivars of southwestern France: discovery of the missing link.  
678 *Australian Journal of Grape and Wine Research.* 2009;15:144–55.
- 679 58. Bowers J, Boursiquot J-M, This P, Chu K, Johansson K, Meredith C. Historical genetics: The  
680 parentage of chardonnay, gamay, and other wine grapes of northeastern France. *Science.*  
681 1999;285:1562–5.
- 682 59. Regner F, Stadlbauer A, Eisenheld C, Kaserer H. Genetic Relationships Among Pinots and  
683 Related Cultivars. *AJEV.* 2000;51:7–14.

- 684 60. Imazio S, Labra M, Grassi F, Winfield M, Bardini M, Scienza A. Molecular tools for clone  
685 identification: the case of the grapevine cultivar “Traminer.” *Plant Breeding*. 2002;121:531–5.
- 686 61. Cingolani P, Platts A, Le Lily Wang, Coon M, Nguyen T, Wang L, *et al.* A program for  
687 annotating and predicting the effects of single nucleotide polymorphisms, SnpEff. *Fly*.  
688 2012;6:80–92.
- 689 62. Gaut BS, Seymour DK, Liu Q, Zhou Y. Demography and its effects on genomic variation in  
690 crop domestication. *Nature Plants*. 2018; doi:0.1038/s41477-018-0210-1
- 691 63. Chen RZ, Pettersson U, Beard C, Jackson-Grusby L, Jaenisch R. DNA hypomethylation  
692 leads to elevated mutation rates. *Nature*. 1998;395:89–93.
- 693 64. Hirochika H, Okamoto H, Kakutani T. Silencing of Retrotransposons in Arabidopsis and  
694 Reactivation by the *ddm1* Mutation. *Plant Cell*. 2000;12:357–68.
- 695 65. Hirsch CD, Springer NM. Transposable element influences on gene expression in plants.  
696 *Biochimica et Biophysica Acta*. 2017;1860:157–65.
- 697 66. Zemach A, McDaniel IE, Silva P, Zilberman D. Genome-Wide Evolutionary Analysis of  
698 Eukaryotic DNA Methylation. *Science*. 2010;328:916–9.
- 699 67. Guarino F, Ciccattelli A, Brundu G, Heinze B, Castiglione S. Epigenetic Diversity of Clonal  
700 White Poplar (*Populus alba* L.) Populations: Could Methylation Support the Success of  
701 Vegetative Reproduction Strategy? *PLoS ONE*. 2015;10:e0131480–20.
- 702 68. Douhovnikoff V, Dodd RS. Epigenetics: a potential mechanism for clonal plant success.  
703 *Plant Ecol*. 2014;216:227–33.



- 704 69. Klekowski EJ Jr., Kazarinova-Fukshansky N. Shoot Apical Meristems and Mutation:  
705 Selective Loss of Disadvantageous Cell Genotypes. *American Journal of Botany*. 1984;71:28–  
706 34.
- 707 70. Thomas MR, Cain P, Scott NS. DNA typing of grapevines: a universal methodology and  
708 database for describing cultivars and evaluating genetic relatedness. *Plant Mol Biol*.  
709 1994;25:939–49.
- 710 71. Sefc KM, Regner F, Turetschek E, Glössl J, Steinkellner H. Identification of microsatellite  
711 sequences in *Vitis riparia* and their applicability for genotyping of different *Vitis* species.  
712 *Genome*. 1999;42:367–73.
- 713 72. Jones L, Riaz S, Morales-Cruz A, Amrine KCH, McGuire B, Gubler WD, *et al.* Adaptive  
714 genomic structural variation in the grape powdery mildew pathogen, *Erysiphe necator*. *BMC*  
715 *Genomics*. 2014; doi:10.1186/1471-2164-15-1081
- 716 73. Minio A, Lin J, Gaut BS, Cantu D. How Single Molecule Real-Time Sequencing and  
717 Haplotype Phasing Have Enabled Reference-Grade Diploid Genome Assembly of Wine Grapes.  
718 *Front Plant Sci*. 2017;8:481–6.
- 719 74. Myers G. *Efficient Local Alignment Discovery amongst Noisy Long Reads*. Wroclaw,  
720 Poland: Springer, Berlin, Heidelberg; 2014. 52–67.
- 721 75. Smit A, Hubley R, Green P. *RepeatMasker Open-4.0*. 2013. Available from:  
722 <http://www.repeatmasker.org>

- 723 76. Minio A, Massonnet M, Figueroa-Balderas R, Vondras AM, Blanco-Ulate B, Cantu D. Iso-  
724 Seq Allows Genome-Independent Transcriptome Profiling of Grape Berry Development. *G3:*  
725 *Genes, Genomes, Genetics*; 2019;9:755–67.
- 726 77. Pertea M, Kim D, Pertea GM, Leek JT, Salzberg SL. Transcript-level expression analysis of  
727 RNA-seq experiments with HISAT, StringTie and Ballgown. *Nat Protoc.* 2016;11:1650–67.
- 728 78. Slater GSC, Birney E. Automated generation of heuristics for biological sequence  
729 comparison. *BMC Bioinformatics.* 2005; doi:10.1186/1471-2105-6-31
- 730 79. Haas BJ, Delcher AL, Mount SM, Wortman JR, Smith RK Jr, Hannick LI, *et al.* Improving  
731 the Arabidopsis genome annotation using maximal transcript alignment assemblies. *Nucleic*  
732 *Acids Research.* 2003;31:5654–66.
- 733 80. Korf I. Gene finding in novel genomes. *BMC Bioinformatics.* 2004; doi:10.1186/1471-2105-  
734 5-59
- 735 81. Stanke M, Keller O, Gunduz I, Hayes A, Waack S, Morgenstern B. AUGUSTUS: ab initio  
736 prediction of alternative transcripts. *Nucleic Acids Research.* 2006;34:W435–9.
- 737 82. Lomsadze A, Ter-Hovhannisyan V, Chernoff YO, Borodovsky M. Gene identification in  
738 novel eukaryotic genomes by self-training algorithm. *Biological Journal of the Linnean Society.*  
739 2005;33:6494–506.
- 740 83. Haas BJ, Salzberg SL, Zhu W, Pertea M, Allen JE, Orvis J, *et al.* Automated eukaryotic gene  
741 structure annotation using EVIDENCEModeler and the Program to Assemble Spliced Alignments.  
742 *Genome Biol.* 2008;9.

- 743 84. Li H, Durbin R. Fast and accurate short read alignment with Burrows-Wheeler transform.  
744 *Bioinformatics*. 2009;25:1754–60.
- 745 85. Van der Auwera GA, Carneiro MO, Hartl C, Poplin R, del Angel G, Levy-Moonshine A, *et*  
746 *al.* From FastQ data to high confidence variant calls: the Genome Analysis Toolkit best practices  
747 pipeline. *Current Protocols in Bioinformatics*. 2013.
- 748 86. Rausch T, Zichner T, Schlattl A, Stutz AM, Benes V, Korbel JO. DELLY: structural variant  
749 discovery by integrated paired-end and split-read analysis. *Bioinformatics*. 2012;28:333–9.
- 750 87. Kofler R, Gómez-Sánchez D, Schlötterer C. PoPoolationTE2: Comparative Population  
751 Genomics of Transposable Elements Using Pool-Seq. *Mol Biol Evol*. 2016;33:2759–64.
- 752 88. Wicker T, Sabot F, Hua-Van A, Bennetzen JL, Capy P, Chalhoub B, *et al.* A unified  
753 classification system for eukaryotic transposable elements. *Nat Rev Genet*. 2007;8:973–82.
- 754
- 755
- 756
- 757
- 758
- 759
- 760
- 761
- 762
- 763

764 **Tables**

765

| Clone # | Common name          | Origin                        | Foundation Plant Services |
|---------|----------------------|-------------------------------|---------------------------|
| 1       | Primitivo            | Bari, Italy                   | Primitivo FPS 03          |
| 2       | Primitivo            | Conegliano, Italy             | Primitivo FPS 06          |
| 4       | Pribidrag            | Svinšće, Croatia              | Zinfandel FPS 43.1        |
| 5       | Pribidrag            | Svinšće, Croatia              | Zinfandel FPS 44.1        |
| 6       | Zinfandel            | California, USA               | Zinfandel FPS 10          |
| 7       | Zinfandel            | California, USA               | Zinfandel FPS 24          |
| 8       | Zinfandel            | California, USA               | Zinfandel FPS 37          |
| 9       | Zinfandel            | California, USA               | Zinfandel FPS 39          |
| 10      | Zinfandel            | California, USA               | Zinfandel FPS 56.1        |
| 11      | Zinfandel            | California, USA               | Zinfandel FPS 40          |
| 12      | Pribidrag            | Marušići, Croatia             | In testing at FPS         |
| 13      | Pribidrag            | Svinšće, Croatia              | Zinfandel FPS 43.1        |
| 14      | Crljenak kaštelanski | University of Zagreb, Croatia | -                         |
| 15      | Pribidrag            | Svinšće, Croatia              | Zinfandel FPS 44.1        |
| Zin03   | Zinfandel            | California, USA               | Zinfandel FPS 03          |

766

**Table 2.** Summary statistics of the Zinfandel genome assembly and annotation.

|                           | Primary             | Haplotig                |
|---------------------------|---------------------|-------------------------|
| Total length              | 591,171,721         | 306,029,957             |
| Number of contigs         | 1,509               | 2,246                   |
| N50                       | 1,062,797           | 442,393                 |
| N75                       | 366,308             | 185,785                 |
| L50                       | 154                 | 200                     |
| L75                       | 395                 | 463                     |
| Median contig length (bp) | 161,249             | 37,307                  |
| Longest contig (bp)       | 7,901,503           | 2,609,171               |
| Shortest contig (bp)      | 17,787              | 1,970                   |
| Average GC content (%)    | 34.45%              | 34.37%                  |
| Number of genes           | 33,523              | 20,037                  |
|                           | <i>Total</i>        | <i>Average per gene</i> |
| Number of exons           | 244,880             | 4.57                    |
| Number of introns         | 191,320             | 3.57                    |
|                           | <i>Average (bp)</i> | <i>Maximum (bp)</i>     |
| mRNA lengths              | 4,166               | 94,143                  |
| Exon lengths              | 245.79              | 7,992                   |
| Intron lengths            | 191,320             | 41,647                  |
| Intergenic distances      | 10,309              | 302,473                 |

767

768

769

770

771

772

773

774

**Table 3.** Sniffles analysis of structural variation between cultivars and between Zinfandel parental haplotypes

|                       | Cabernet Sauvignon vs. Zinfandel |              |              |                           |                 | Zinfandel haplotig vs. Zinfandel primary |              |              |                           |                |
|-----------------------|----------------------------------|--------------|--------------|---------------------------|-----------------|------------------------------------------|--------------|--------------|---------------------------|----------------|
|                       | <i>Median Size (bp)</i>          | <i>Count</i> | <i>Genes</i> | <i>Total SV size (Mb)</i> | <i>% genome</i> | <i>Median Size (bp)</i>                  | <i>Count</i> | <i>Genes</i> | <i>Total SV size (Mb)</i> | <i>% genom</i> |
| Deletions             | 196                              | 46,363       | 9,219        | 115.0                     | 12.82           | 203                                      | 12,031       | 2,521        | 26,953,558                | 4.56           |
| Duplications          | 5,518                            | 2,884        | 3,286        | 48.7                      | 5.43            | 1,966                                    | 553          | 535          | 7,604,041                 | 1.29           |
| Insertions            | 88                               | 37,407       | 5,225        | 23.9                      | 2.66            | 92                                       | 9,647        | 2,081        | 5,594,259                 | 0.95           |
| Inversions            | 6,037                            | 607          | 1,440        | 20.6                      | 2.30            | 3,592                                    | 111          | 391          | 5,521,214                 | 0.93           |
| Duplicated Insertions | 339                              | 9            | 2            | 0.0439                    | 0.0049          | 385                                      | 3            | 2            | 6,861                     | 0.0012         |
| Inverted Duplications | 293                              | 65           | 12           | 0.0418                    | 0.0047          | 113                                      | 54           | 11           | 12,930                    | 0.0022         |

775

776 **Figure legends**

777

778 **Figure 1.** Structural variation between Zin03 haplotypes. **a.** Distribution of structural variation  
779 sizes. Boxplots show the 25<sup>th</sup> quartile, median, and 75<sup>th</sup> quartile for each type of SV. Whiskers  
780 are 1.5<sup>Inter-Quartile Range</sup>. Diamonds indicate the mean log<sub>10</sub>(length) of each type of SV; **b,c,d.**  
781 Examples of heterozygous structural variants between haplotypes that intersect genes. For each  
782 reported structural variation, (from top to bottom) the coverage, haplotype-resolved alignment of  
783 reads, and the genes annotated in the region are shown; **b.** 4 kbp heterozygous deletion of two  
784 genes; **c.** 11 kbp heterozygous deletion of two genes; **d.** 22 kbp inversion that intersects a single  
785 gene. Triangles indicate boundaries of the inversion. A gap is shown rather than the center of the  
786 inverted region.

787

788 **Figure 2.** Gene content and structural variability between Zin03 and other *V. vinifera* genomes.  
789 **a.** Uniquely occurring Zinfandel genes and the number of Zinfandel genes that align well to other  
790 cultivars with  $\geq 80\%$  identity and reciprocal coverage. The total number of hits (or total gene  
791 content for Zin03) is indicated by the “Set Size” and the exclusive hits for each intersection is  
792 indicated as the “Intersection Size”; **b. Boxplot shows the sizes of structural variations; c,d.**  
793 Selected deletions in Cabernet sauvignon relative to Zin03 that intersect genes. For each reported  
794 deletion, (from top to bottom) the coverage of reads over the region by long Zinfandel and  
795 Cabernet Sauvignon reads, haplotype-resolved alignment of the reads, and the genes annotated in  
796 the region are shown; **b.** Two genes are completely deleted in Cabernet Sauvignon relative to  
797 Zinfandel and are deleted in one Zinfandel haplotype; **c.** One gene contains a homozygous partial  
798 deletion in Cabernet Sauvignon.

799  
800 **Figure 3.** The relationships between Zinfandel selections. **a.** Principal component analysis of  
801 Zinfandel selections based on SNP data. Zin03 was not included in the analysis; **b.** Kinship  
802 analysis of Zinfandel selections and other cultivars with known relationships based on SNP data  
803 and outside of annotated repeats. The Kinship coefficient, PHI, is shown, as well as a  
804 dendrogram constructed by hierarchically clustering genotypes using their kinship coefficients.

805  
806 **Figure 4.** Characterization of variants and their frequency among Zinfandel selections and other  
807 *vinifera* cultivars (Pinot Noir, Chardonnay, Merlot, Cabernet Franc, and Sauvignon Blanc). The  
808 normalized rate of variants (number of variants divided by the total feature length in the genome  
809 \* 1k) by type (SNP, INDEL), feature (Intergenic, Intron, Exon), and genotype (Non-Zinfandel  
810 Cultivars, Zinfandel selections). Boxplots show the 25<sup>th</sup> quartile, median, and 75<sup>th</sup> quartile.

811  
812 **Figure 5.** The abundance and impact of shared and unique heterozygous mutations among  
813 Zinfandel clones. **a.** The number of heterozygous SNPs, INDELs, and SVs are shared by N  
814 Zinfandel clones; **b.** The number of SNPs and INDELs shared by N clones in exons, introns,  
815 intergenic repeats (“Repeats”), and non-repetitive intergenic space; **c.** The ratio of transitions  
816 (Tr) to transversions (Tv) for heterozygous SNPs that uniquely occur in single Zinfandel clones  
817 and in different genome features. Different letters correspond to significant differences in Tr/Tv  
818 rates between features (ANOVA, Tukey HSD,  $p < 0.01$ ); **d.** The percentage of CpG, CHG, and  
819 CHH in exons, introns, intergenic repeats (“Repeats”), and non-repetitive intergenic space that  
820 experiences transition mutations. Comparisons were made between features for each type of C-  
821 repeat separately. Different letters correspond to significant differences (Tukey HSD,  $p < 0.01$ );  
822 **e.** Proportion of exonic SNPs and INDELs that are deleterious and shared by N Zinfandel clones  
823

824 **Figure 6.** Transposable element insertions among Zinfandel selections. **a.** Transposable element  
825 insertions shared among N Zinfandel selections relative to Zin03 and PN40024; **b.** Types of  
826 transposable element insertions shared by N Zinfandel selections; **c.** The proximity of intergenic  
827 transposable element insertions to genes

828

## 829 **Additional files**

830

831 **Additional file 1.** .docx ; Method to extraction phenolic metabolites from Heritage Vineyard  
832 Zinfandel clones and discriminant analysis of Zinfandel clones based on their phenolic profiles.

833



834 **Additional file 2.** .xlsx ; Unique genes identified in Zinfandel, not identified in Pinot Noir and  
835 Cabernet Sauvignon (309), with associated Gene Ontology categories.

836

837 **Additional file 3.** .xlsx ; The first tab of this excel file is a summary of variants relative to the  
838 Zinfandel reference genome and the second is a summary of the SnpEff analysis of variants, with  
839 mean values  $\pm$  SEM shown, and excluding sites where samples and Zin03 have identical  
840 heterozygous genotypes at the locus.

841

842 **Additional file 4.** .txt ; Settings and data used for Zin03 genome assembly, annotation, and  
843 variant calling.

844

845 **Additional file 5.** .sh ; Bioinformatic pipeline for SNP, INDEL, and SV calling.

846

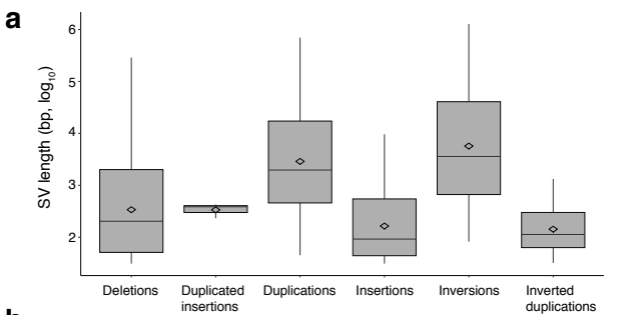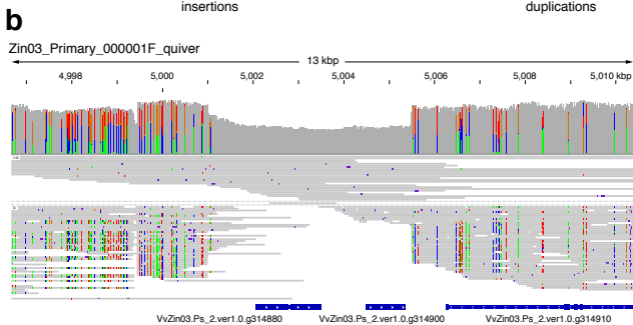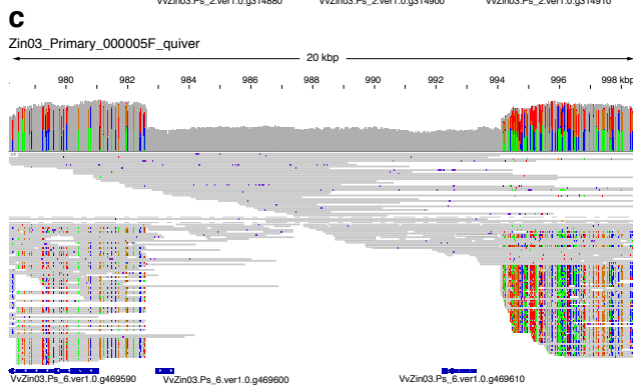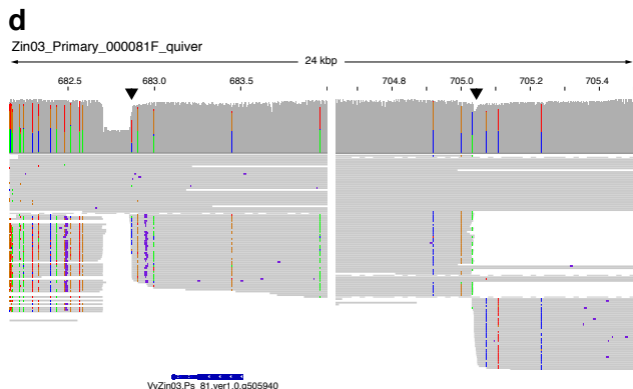

**a**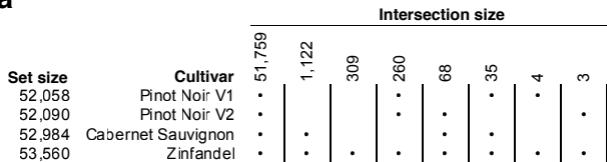**b**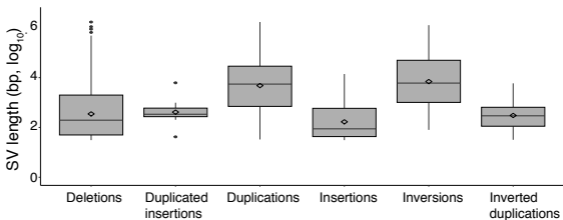**c**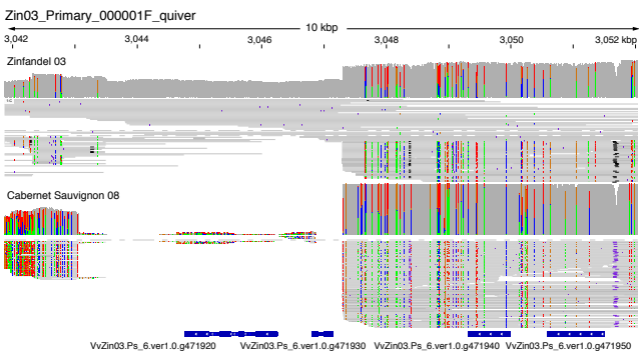**d**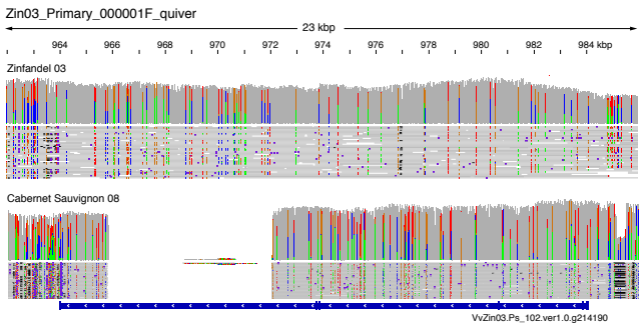

**a**

- Italy
- Croatia
- California

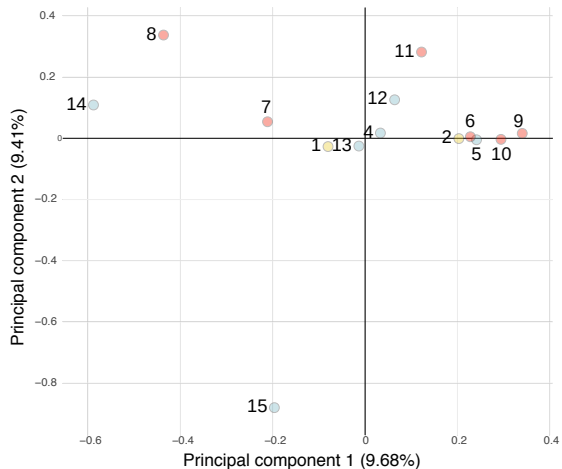

**b**

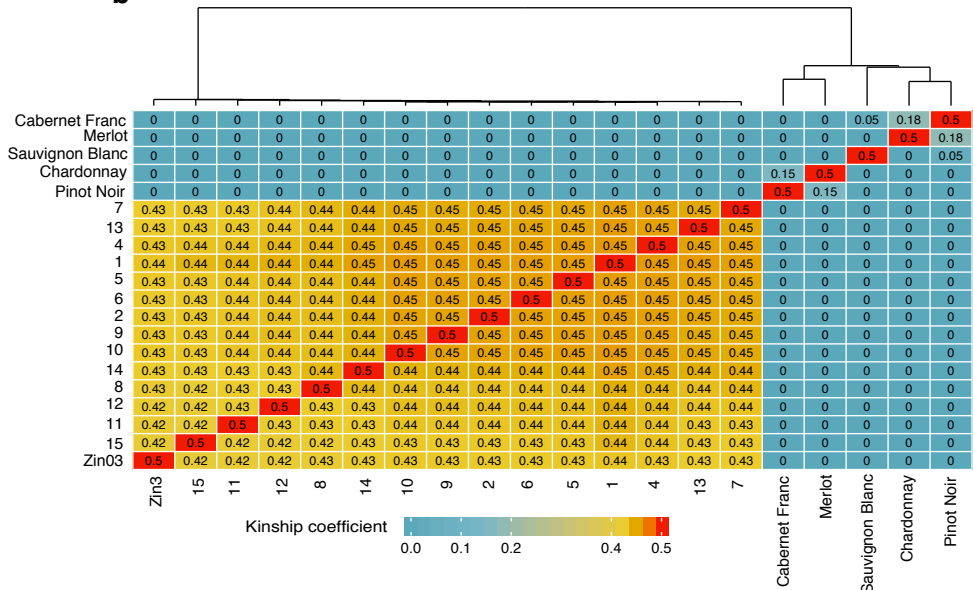

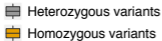

Normalized variants per feature (counts / kbp)

Between cultivars

Between clones

SNPS

INDELS

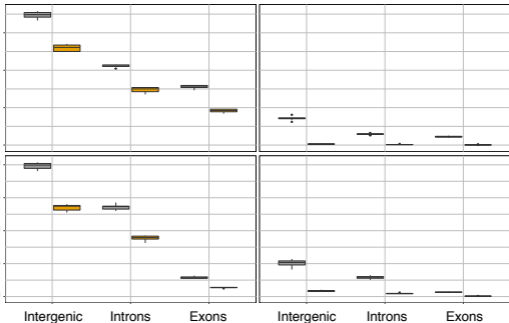

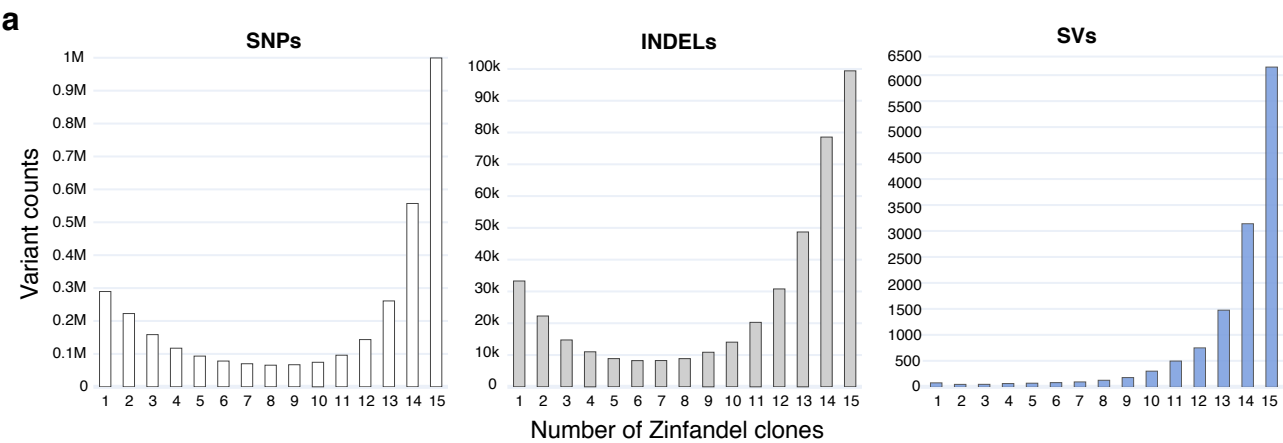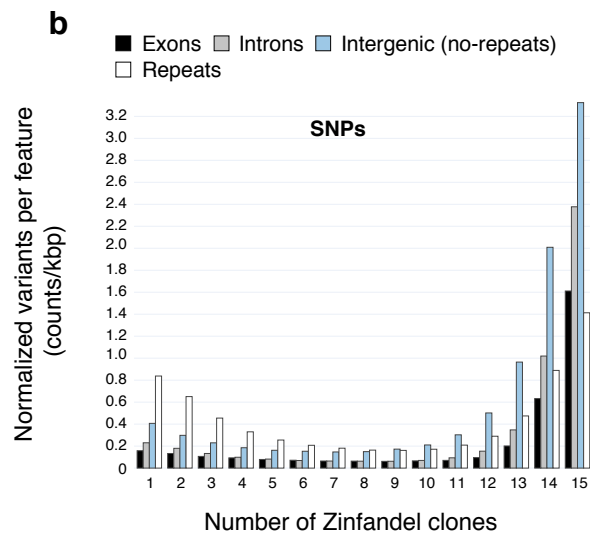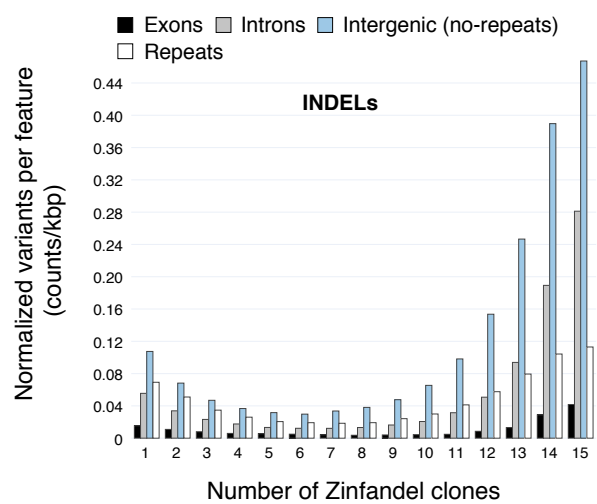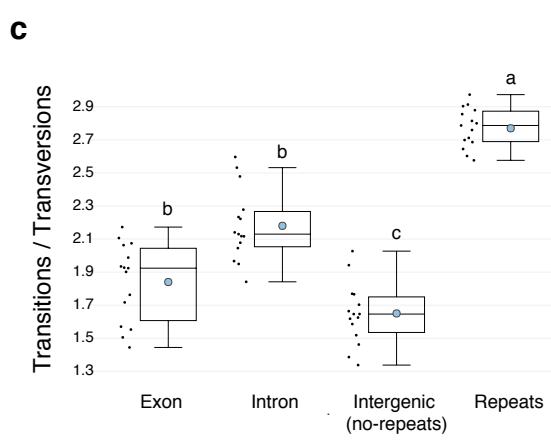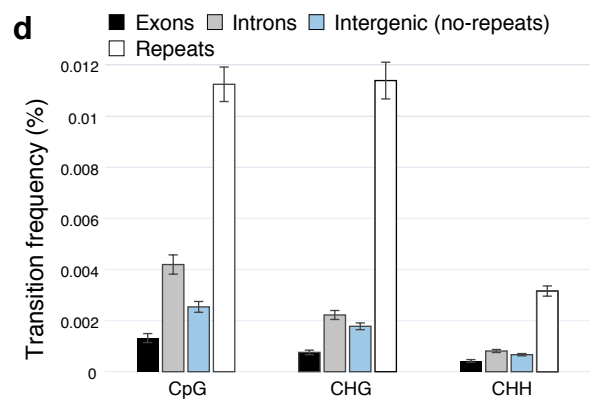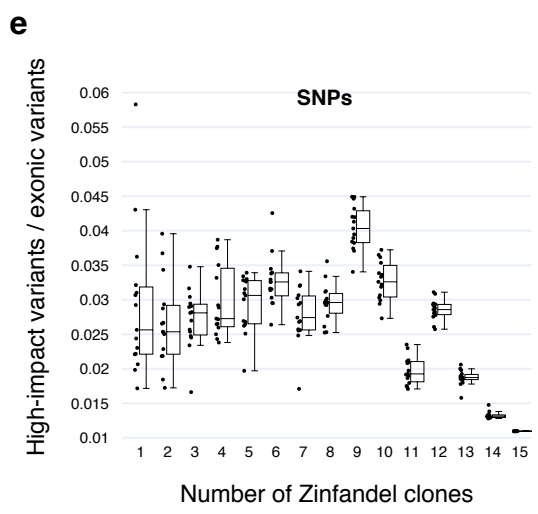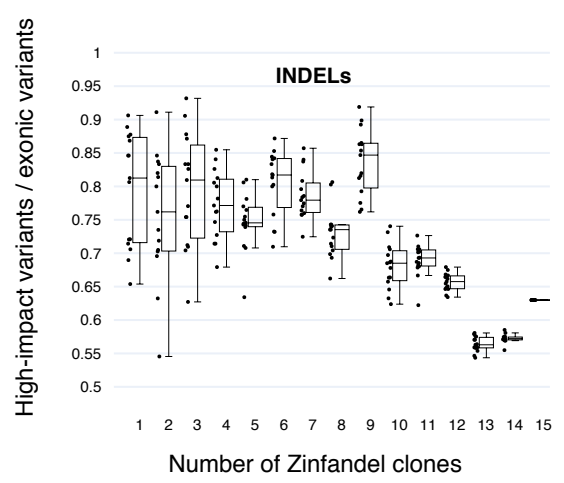

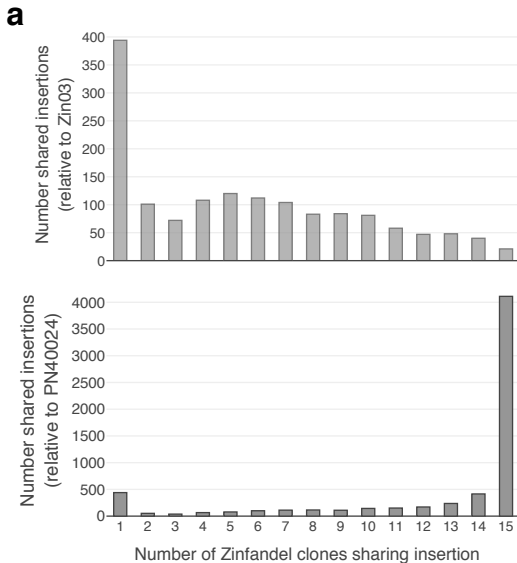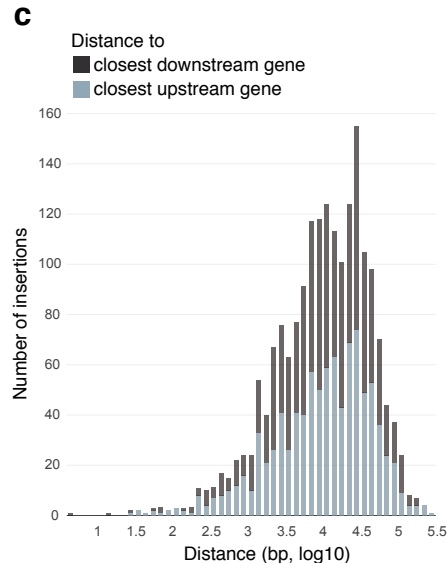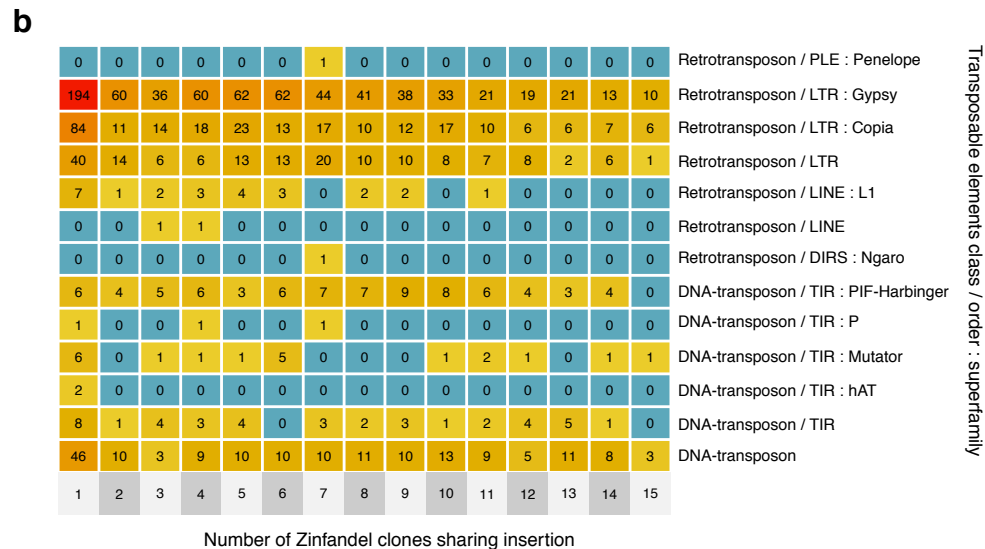

Source: https://www.biorxiv.org/content/10.1101/585869v3.full.pdf
